# Supplementary material for: Reflow-molded deep concave microwell arrays for robust and large-scale production of embryoid bodies
Source: Royal Society of Chemistry journal article supplement (doi:10.1039/d3lc00504f), 2023-01-01
Supplement: d3lc00504f12.pdf [file d3lc00504f12.pdf]

## Supplementary information

### **Reflow-Molded Deep Concave Microwell Arrays for Robust and Large-Scale Production of Embryoid Bodies**

Xue Han<sup>a</sup>, Qi Zhang<sup>a</sup>, Hui He<sup>b</sup>, Qiang Zhao<sup>a\*</sup>, and Gang Li<sup>a\*</sup>

*<sup>a</sup>Defense Key Disciplines Lab of Novel Micro-Nano Devices and System Technology, Key Laboratory of Optoelectronic Technology and Systems, Ministry of Education, Chongqing University, Chongqing 400044, China.*

*<sup>b</sup>Institute of Neuroscience, Key Laboratory of Primate Neurobiology, CAS Center for Excellence in Brain Science and Intelligence Technology, Chinese Academy of Sciences, Shanghai 200031, China*

\*Corresponding author. Tel: +86-23-65111011 (G. Li)

\*Email address: qiangzh@cqu.edu.cn (Q. Zhao); gang\_li@cqu.edu.cn (G. Li)

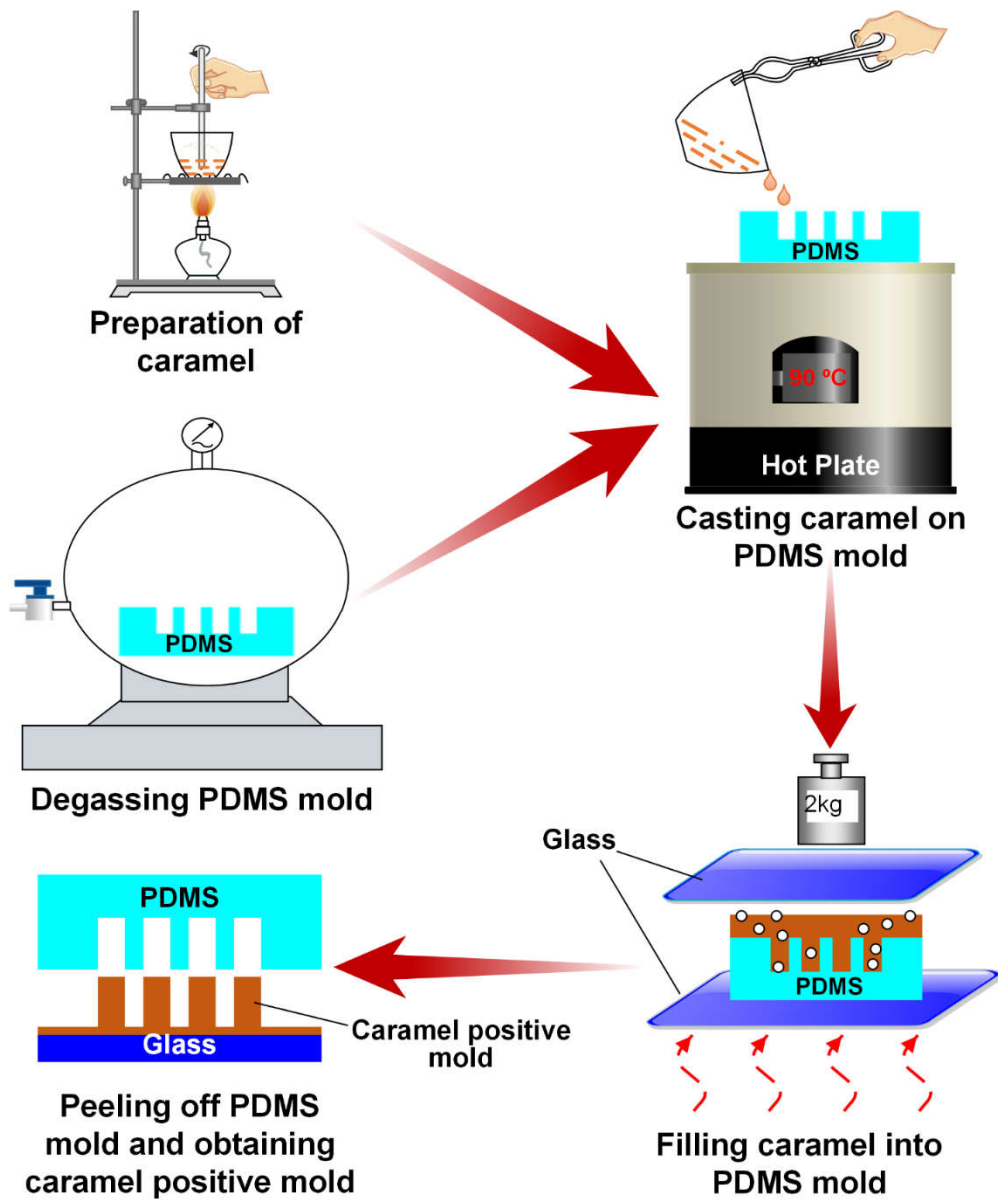

Fig. S1. Schematic diagram of the caramel replica moulding process.

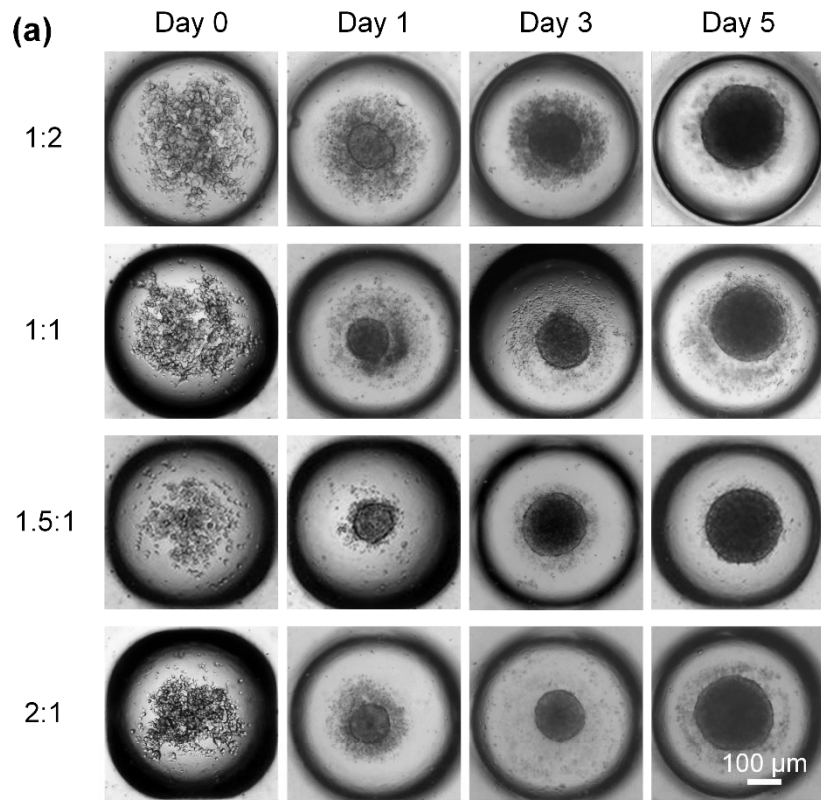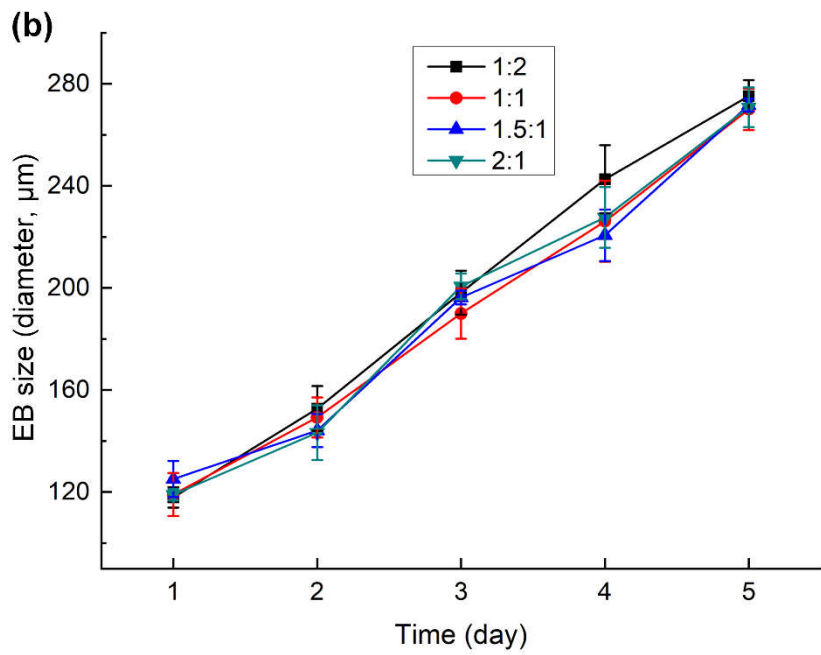

**Fig. S2.** Formation and growth of EBs in concave microwells of different ARs. (a) Time-lapse photographs recorded for the formation of EBs in concave microwells of different ARs. (b) Growth curves of EBs cultured in concave microwells of different ARs.

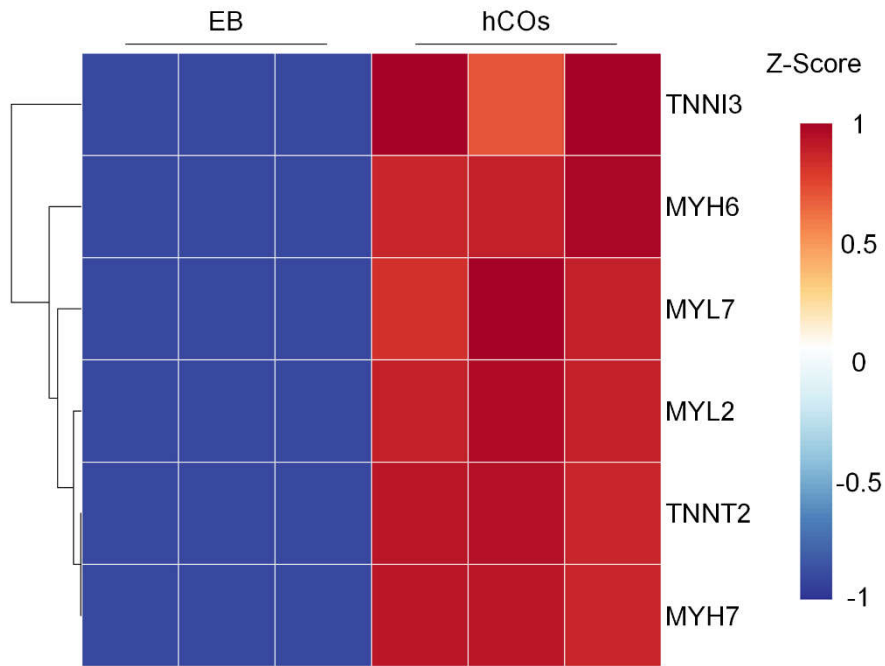

**Fig. S3.** Heat map analysis of cardiac structural gene expression between undifferentiated EBs and hCOs.

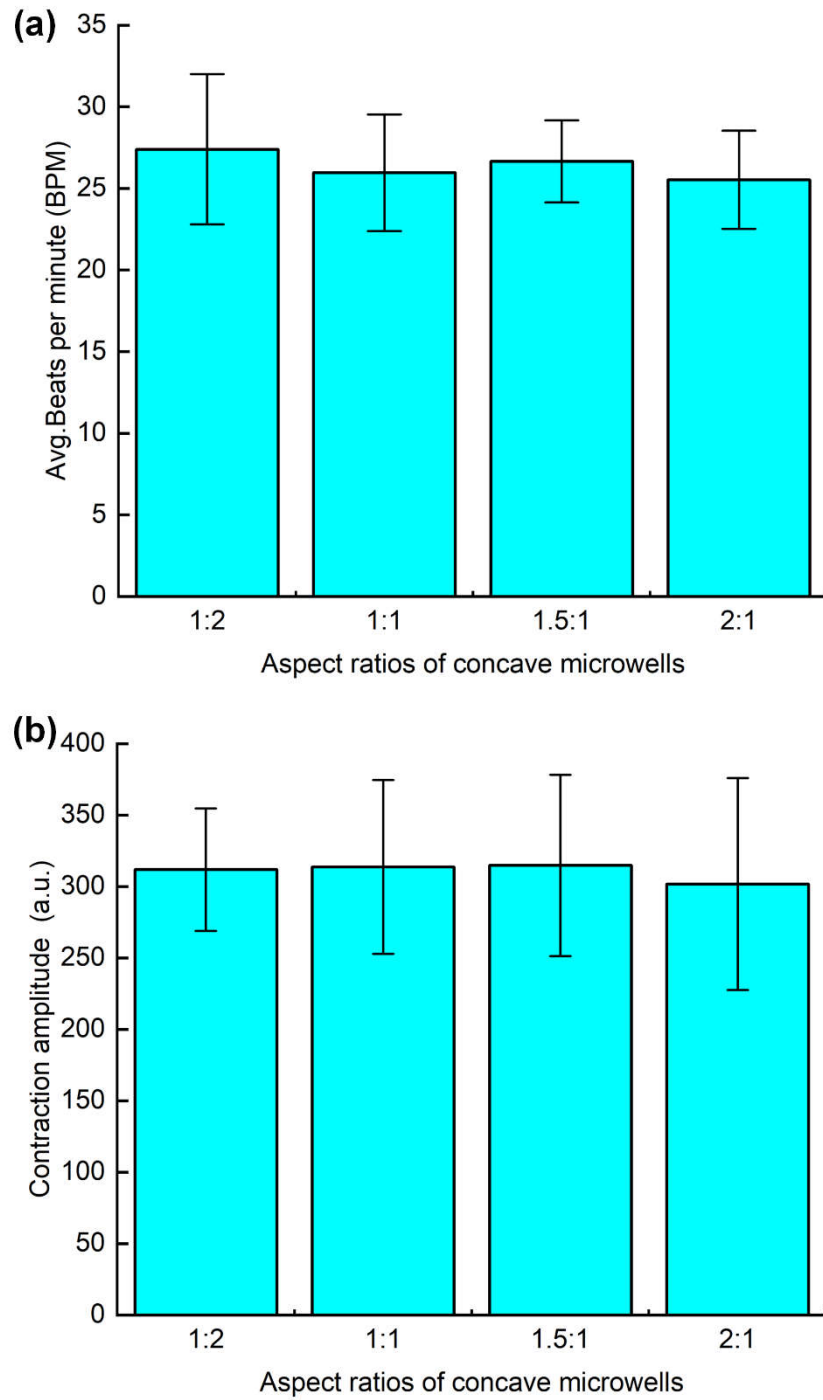

**Fig. S4.** Comparison of the contractile properties of hCOs differentiated from EBs cultured in concave microwells of different ARs. (a) Beating frequency. (b) Contraction amplitude.

**Table S1.** The physical parameters used for the COMSOL CFD modeling.<sup>1,2</sup>

|                                                                             |                                                      |
|-----------------------------------------------------------------------------|------------------------------------------------------|
| Diffusion coefficient of glucose                                            | $8 \times 10^{-11} \text{ m}^2/\text{s}$             |
| Diffusion coefficient of lactate                                            | $1.1 \times 10^{-10} \text{ m}^2/\text{s}$           |
| Maximum consumption rate of glucose                                         | $3.4 \times 10^{-7} \text{ mol}/\text{m}^2/\text{s}$ |
| Consumption constant of glucose                                             | $0.58 \text{ mol}/\text{m}^3$                        |
| Average flow rate                                                           | 1~5 mm/s                                             |
| Initial concentration of glucose in fresh medium                            | $25 \text{ mol}/\text{m}^3$                          |
| Initial concentration of lactate in fresh medium                            | $0 \text{ mol}/\text{m}^3$                           |
| Initial concentration of lactate in microwells before applying fresh medium | $30 \text{ mol}/\text{m}^3$                          |
| Diameter of concave microwells                                              | 500 $\mu\text{m}$                                    |
| Diameter of spheroids                                                       | 250 $\mu\text{m}$                                    |

**Table S2.** List of primers used in this study.

| Gene                            | Forward 5'-3'                | Reverse 3'-5'              |
|---------------------------------|------------------------------|----------------------------|
| <b>Oct3/4</b>                   | GACAGGGGGAGGGGAGGAGCTAGG     | CTTCCCTCCAACCAGTTGCCCAAAC  |
| <b>Nanog</b>                    | CAGCCCCGATTCTTCCACCAGTCCC    | CGGAAGATTCCCAGTCGGGTTCCACC |
| <b>Pax6</b>                     | ACCCATTATCCAGATGTGTTTGCCCGAG | ATGGTGAAGCTGGGCATAGGCGGCAG |
| <b>Brachyury</b>                | GCCCTCTCCCTCCCCTCCACGCACAG   | CGGCGCCGTTGCTCACAGACCACAGG |
| <b>AFP</b>                      | GAATGCTGCAAAGTACCACGCTGGAAC  | TGGCATTCAAGAGGGTTCAGTCTGGA |
| <b><math>\beta</math>-Actin</b> | ACCCCGTGCTGCTGACCGAG         | TCCCGGCCAGCCAGGTCCA        |
| <b>TNNT2</b>                    | TTCACCAAAGATCTGCTCCTCGCT     | TTATTACTGGTGTGGAGTGGGTGTG  |
| <b>TNNI3</b>                    | GGAGGACACCGAGAAGGAAAAC       | TCAAACCTTTTCTTGCGGCC       |
| <b>MYH6</b>                     | TCAGCTGGAGGCCAAAGTAAAGGA     | TTCTTGAGCTCTGAGCACTCGTCT   |
| <b>MYH7</b>                     | TCGTGCCTGATGACAAACAGGAGT     | ATACTCGGTCTCGGCAGTGACTTT   |
| <b>MYL2</b>                     | GCAGGCGGAGAGGTTTTC           | AGTTGCCAGTCACGTCAGG        |
| <b>MYL7</b>                     | CTTGTAGTCGATGTTCCCCG         | TCAAGCAGCTTCTCCTGACC       |
| <b>GADPH</b>                    | GGAAGGTGAAGGTCGGAGT          | GGGTCATTGATGGCAACA         |

**Table S3.** Measured shape parameters of 60 EBs randomly collected from a deep concave microwell array for 5 days.

| No. | Area ( $\mu\text{m}^2$ ) | Perimeter ( $\mu\text{m}$ ) | Major diameter ( $\mu\text{m}$ ) | Minor diameter ( $\mu\text{m}$ ) | Circularity | Solidity |
|-----|--------------------------|-----------------------------|----------------------------------|----------------------------------|-------------|----------|
| 1   | 55933.41                 | 887.660                     | 271.235                          | 262.564                          | 0.892       | 0.960    |
| 2   | 59881.09                 | 909.533                     | 279.771                          | 272.519                          | 0.910       | 0.965    |
| 3   | 55790.73                 | 866.480                     | 269.679                          | 263.405                          | 0.934       | 0.967    |
| 4   | 55980.98                 | 919.286                     | 280.502                          | 254.106                          | 0.832       | 0.953    |
| 5   | 50558.86                 | 837.220                     | 254.435                          | 253.006                          | 0.906       | 0.964    |
| 6   | 60356.72                 | 919.286                     | 283.380                          | 271.186                          | 0.897       | 0.965    |
| 7   | 56789.54                 | 887.660                     | 277.091                          | 260.949                          | 0.906       | 0.966    |
| 8   | 52746.73                 | 845.300                     | 262.973                          | 255.384                          | 0.928       | 0.970    |
| 9   | 47562.43                 | 807.961                     | 250.473                          | 241.776                          | 0.916       | 0.964    |
| 10  | 61022.59                 | 923.326                     | 281.816                          | 275.699                          | 0.899       | 0.965    |
| 11  | 58549.35                 | 903.819                     | 280.156                          | 266.092                          | 0.901       | 0.961    |
| 12  | 55029.73                 | 876.233                     | 270.165                          | 259.345                          | 0.901       | 0.955    |
| 13  | 54030.92                 | 881.947                     | 272.895                          | 252.091                          | 0.873       | 0.961    |
| 14  | 58263.97                 | 894.066                     | 273.894                          | 270.850                          | 0.916       | 0.967    |

|            |          |          |          |          |          |       |
|------------|----------|----------|----------|----------|----------|-------|
| 15         | 55933.41 | 874.560  | 273.194  | 260.682  | 0.919    | 0.966 |
| 16         | 61355.53 | 915.939  | 282.827  | 276.212  | 0.919    | 0.970 |
| 17         | 52318.67 | 845.300  | 263.337  | 252.962  | 0.920    | 0.966 |
| 18         | 61212.84 | 940.466  | 285.773  | 272.729  | 0.870    | 0.958 |
| 19         | 60404.28 | 921.652  | 280.824  | 273.869  | 0.894    | 0.967 |
| 20         | 51938.17 | 856.727  | 262.731  | 251.701  | 0.889    | 0.965 |
| 21         | 54004.98 | 860.286  | 267.065  | 257.470  | 0.917    | 0.963 |
| 22         | 56745.09 | 896.079  | 274.039  | 263.649  | 0.888    | 0.954 |
| 23         | 57392.75 | 890.232  | 275.138  | 265.593  | 0.910    | 0.957 |
| 24         | 62125.66 | 936.716  | 294.543  | 268.555  | 0.890    | 0.957 |
| 25         | 48524.77 | 816.223  | 255.806  | 241.525  | 0.915    | 0.963 |
| 26         | 55449.77 | 878.537  | 274.143  | 257.532  | 0.903    | 0.959 |
| 27         | 58887.35 | 924.312  | 279.964  | 267.812  | 0.866    | 0.956 |
| 28         | 54403.54 | 888.519  | 271.838  | 254.816  | 0.866    | 0.950 |
| 29         | 52460.56 | 856.860  | 265.537  | 251.547  | 0.898    | 0.960 |
| 30         | 55698.87 | 862.708  | 271.154  | 261.541  | 0.940    | 0.971 |
| 31         | 58688.07 | 894.366  | 286.193  | 261.096  | 0.922    | 0.965 |
| 32         | 61428.18 | 944.986  | 282.233  | 277.121  | 0.864    | 0.958 |
| 33         | 55150.84 | 870.268  | 266.017  | 263.969  | 0.915    | 0.961 |
| 34         | 55499.59 | 878.537  | 268.719  | 262.967  | 0.904    | 0.960 |
| 35         | 55549.41 | 890.232  | 283.678  | 249.324  | 0.881    | 0.957 |
| 36         | 55399.95 | 874.402  | 267.121  | 264.065  | 0.911    | 0.962 |
| 37         | 58787.71 | 908.483  | 280.543  | 266.807  | 0.895    | 0.957 |
| 38         | 59634.65 | 910.196  | 281.792  | 269.451  | 0.905    | 0.958 |
| 39         | 57791.31 | 888.519  | 273.799  | 268.745  | 0.920    | 0.964 |
| 40         | 57492.39 | 900.214  | 282.063  | 259.522  | 0.892    | 0.959 |
| 41         | 53785.83 | 864.295  | 270.970  | 252.730  | 0.905    | 0.960 |
| 42         | 54467.28 | 868.382  | 266.027  | 260.687  | 0.908    | 0.963 |
| 43         | 49259.06 | 826.521  | 250.930  | 249.945  | 0.906    | 0.959 |
| 44         | 56122.23 | 874.161  | 271.366  | 263.323  | 0.923    | 0.964 |
| 45         | 51449.43 | 844.562  | 258.678  | 253.239  | 0.906    | 0.958 |
| 46         | 54905.35 | 870.074  | 268.036  | 260.814  | 0.911    | 0.960 |
| 47         | 53299.08 | 871.767  | 264.865  | 256.216  | 0.881    | 0.955 |
| 48         | 54661.98 | 862.602  | 267.617  | 260.065  | 0.923    | 0.964 |
| 49         | 50475.93 | 824.828  | 254.973  | 252.058  | 0.932    | 0.968 |
| 50         | 46387.24 | 792.834  | 248.645  | 237.535  | 0.927    | 0.965 |
| 51         | 52520.28 | 840.475  | 259.532  | 257.660  | 0.934    | 0.967 |
| 52         | 45608.44 | 787.055  | 244.407  | 237.598  | 0.925    | 0.963 |
| 53         | 58166.58 | 888.115  | 274.559  | 269.742  | 0.927    | 0.966 |
| 54         | 46971.34 | 806.788  | 248.604  | 240.566  | 0.907    | 0.957 |
| 55         | 54954.03 | 864.295  | 271.368  | 257.840  | 0.924    | 0.965 |
| 56         | 50914.01 | 836.388  | 264.553  | 245.038  | 0.915    | 0.959 |
| 57         | 51011.36 | 828.915  | 256.232  | 253.480  | 0.933    | 0.966 |
| 58         | 45267.71 | 791.142  | 246.346  | 233.967  | 0.909    | 0.959 |
| 59         | 49843.16 | 820.741  | 256.800  | 247.128  | 0.930    | 0.965 |
| 60         | 47020.01 | 805.095  | 247.344  | 242.042  | 0.912    | 0.961 |
| <b>Avg</b> | 54731.09 | 870.9022 | 269.1731 | 258.5318 | 0.906033 | 0.961 |
| <b>SD</b>  | 4284.968 | 38.93852 | 11.60325 | 10.3456  | 0.020534 | 0.004 |
| <b>CV</b>  | 0.078291 | 0.044711 | 0.043107 | 0.040017 | 0.022663 | 0.004 |

**Table S4.** Measured shape parameters of 20 hCOs randomly collected from a deep concave microwell array for 25 days.

| No.        | Area ( $\mu\text{m}^2$ ) | Perimeter ( $\mu\text{m}$ ) | Major diameter ( $\mu\text{m}$ ) | Minor diameter ( $\mu\text{m}$ ) | Circularity | Solidity |
|------------|--------------------------|-----------------------------|----------------------------------|----------------------------------|-------------|----------|
| 1          | 395188.8                 | 2486.826                    | 777.968                          | 646.774                          | 0.803       | 0.974    |
| 2          | 402334.3                 | 2547.117                    | 756.333                          | 677.305                          | 0.779       | 0.962    |
| 3          | 373442.2                 | 2572.090                    | 819.452                          | 580.244                          | 0.709       | 0.934    |
| 4          | 387500.8                 | 2489.297                    | 743.185                          | 663.874                          | 0.786       | 0.959    |
| 5          | 356717.7                 | 2513.150                    | 734.268                          | 618.557                          | 0.710       | 0.946    |
| 6          | 369908.2                 | 2567.477                    | 701.419                          | 671.470                          | 0.705       | 0.936    |
| 7          | 414145.3                 | 2713.59                     | 795.163                          | 663.142                          | 0.707       | 0.933    |
| 8          | 361259.2                 | 2472.034                    | 746.284                          | 616.346                          | 0.743       | 0.954    |
| 9          | 356578.2                 | 2518.718                    | 758.137                          | 598.849                          | 0.706       | 0.938    |
| 10         | 386353.8                 | 2565.567                    | 745.245                          | 660.079                          | 0.738       | 0.946    |
| 11         | 336505.7                 | 2385.024                    | 746.463                          | 573.977                          | 0.743       | 0.956    |
| 12         | 438542.4                 | 2807.683                    | 777.477                          | 718.181                          | 0.699       | 0.936    |
| 13         | 426095.9                 | 2637.156                    | 783.033                          | 692.847                          | 0.770       | 0.955    |
| 14         | 328042.7                 | 2213.774                    | 681.874                          | 612.542                          | 0.841       | 0.976    |
| 15         | 340024.2                 | 2439.350                    | 750.541                          | 576.827                          | 0.718       | 0.954    |
| 16         | 364576.2                 | 2336.033                    | 726.996                          | 638.508                          | 0.84        | 0.974    |
| 17         | 331421.7                 | 2236.277                    | 687.666                          | 613.640                          | 0.833       | 0.973    |
| 18         | 331483.7                 | 2326.480                    | 696.717                          | 605.782                          | 0.770       | 0.963    |
| 19         | 316278.1                 | 2254.891                    | 696.491                          | 578.181                          | 0.782       | 0.966    |
| 20         | 360143.2                 | 2323.614                    | 702.419                          | 652.813                          | 0.838       | 0.966    |
| <b>Avg</b> | 368827.1                 | 2470.307                    | 741.357                          | 632.997                          | 0.761       | 0.955    |
| <b>SD</b>  | 34205.2                  | 158.262                     | 38.271                           | 41.739                           | 0.050       | 0.014    |
| <b>CV</b>  | 9.2%                     | 6.4%                        | 5.1%                             | 6.5%                             | 6.6%        | 1.5%     |

## References

- [1] W. Gu, X. Gaeta, A. Sahakyan, A. B. Chan, C. S. Hong, R. Kim, D. Braas, K. Plath, W. E. Lowry and H. R. Christofk, *Cell stem cell*, 2016, **19**, 476-490.
- [2] J. Pfeuffer, I. Tkáč and R. Gruetter, *J. Cereb. Blood Flow Metab.*, 2000, **20**, 736-746.



## **Legends of Videos**

**Movie S1:** Outer flow-induced motion of EBs in a concave microwell with 1:2 aspect ratio.

**Movie S2:** Outer flow-induced motion of EBs in a concave microwell with 1:1 aspect ratio.

**Movie S3:** Outer flow-induced motion of EBs in a concave microwell with 1.5:1 aspect ratio.

**Movie S4:** Outer flow-induced motion of EBs in a concave microwell with 2:1 aspect ratio.

**Movie S5:** Beating of hCOs without drug treatment.

**Movie S6:** Beating of hCOs after treatment with 0.01  $\mu\text{M}$  isoproterenol.

**Movie S7:** Beating of hCOs after treatment with 0.03  $\mu\text{M}$  isoproterenol.

**Movie S8:** Beating of hCOs after treatment with 0.1  $\mu\text{M}$  isoproterenol.

**Movie S9:** Beating of hCOs after treatment with 0.01  $\mu\text{M}$  verapamil.

**Movie S10:** Beating of hCOs after treatment with 0.03  $\mu\text{M}$  verapamil.

**Movie S11:** Beating of hCOs after treatment with 0.1  $\mu\text{M}$  verapamil.
